# Supplementary material for: Comparative Interactome Analysis of Emerin, MAN1 and LEM2 Reveals a Unique Role for LEM2 in Nucleotide Excision Repair
Source: MDPI journal article supplement (doi:10.3390/cells9020463), 2020-02-18
Supplement: s1 [file s1]

## Supplementary Material:

**Supplementary Table S1: Mass spectrometry data.** Interactors detected in LEM2 (LEM2), MAN1 (LEMD3) emerlin (EMD) and GFP (GFP) BioID. A) Raw spectral count data MS analyses. B-H): High confidence (hc) (average probability (AvgP) of  $\geq 0.45$ ) interactors. Bait: BirA\*-Emerin-V5 (EMD), BirA\*-LEM2-V5 (LEM2) and BirA\*-MAN1-V5 (LEMD3), Protein GI (NCBI): Protein GenInfo Identifier from (National Center for Biotechnology), PreyGene: Gene name, Spec: Spectral counts of each BioID experiment, SpecSum: sum of spectral counts, AvgSpec: average spectral counts per BioID experiment, NumRep: Number of BioID experiments, iProp: individual SAINT probabilities, ctrlCounts: spectral counts of all BioID controls, AvgP: average SAINT score (probability score which shows the average of all individual SAINT probabilities), MaxP: largest probability (iProb) (reports the largest probability of a bait-prey pair across all replicates), FDR: false discovery rate (post-hoc calculation of the false discovery rates of AvgP).

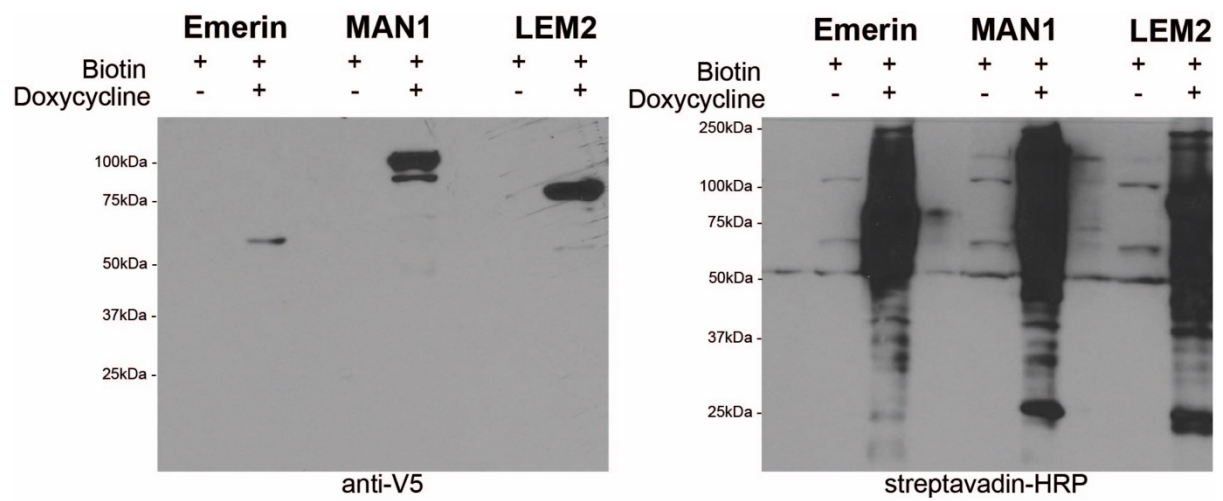

**Supplementary Figure 1:** Full unedited immunoblot for Figure 1D.
